# Supplementary material
Source: publisher site journal article supplement (https://www.dovepress.com/article/260926)
Supplement: Supplementary file 1 [file get_supplementary_file.php]

## SYMPTOMS AND PAIN QUESTIONNAIRE

### 1. Have you experienced foreign body sensation?

Yes     No    If yes,  OD         OS         OU

If yes, did it start immediately after drop instillation?

OD:     Yes         No                 Don't remember

OS:     Yes         No                 Don't remember

How long did it last?

OD:     1 min or less     2 to 5 min         6-10 min         > 10 min

OS:     1 min or less     2 to 5 min         6-10 min         > 10 min

How severe was it?

OD:  Mild                 Moderate         Severe

OS:  Mild                 Moderate         Severe

Place a vertical mark on the line below to indicate the severity.

**OD**

No pain | \_\_\_\_\_ | Very Severe Pain

**OS**

No pain | \_\_\_\_\_ | Very Severe Pain

### 2. Have you experienced stinging/burning?

Yes     No    If yes,  OD         OS         OU

If yes, did it start immediately after drop instillation?

OD:     Yes         No                 Don't remember

OS:     Yes         No                 Don't remember

How long did it last?

OD:     1 min or less     2 to 5 min         6-10 min         > 10 min

OS:     1 min or less     2 to 5 min         6-10 min         > 10 min

How severe was it?

OD:     Mild                 Moderate         Severe

OS:     Mild                 Moderate         Severe

Place a vertical mark on the line below to indicate the severity.

**OD**

No pain | \_\_\_\_\_ | Very Severe Pain

**OS**

No pain | \_\_\_\_\_ | Very Severe Pain

**3. Have you experienced any pain/discomfort?**

Yes     No    If yes,  OD     OS     OU

If yes, did it start immediately after drop instillation?

OD:     Yes     No     Don't remember

OS:     Yes     No     Don't remember

How long did it last?

OD:     1 min or less     2 to 5 min     6-10 min     > 10 min

OS:     1 min or less     2 to 5 min     6-10 min     > 10 min

How severe was it?

OD:     Mild     Moderate     Severe

OS:     Mild     Moderate     Severe

Place a vertical mark on the line below to indicate the severity.

**OD**

No pain | \_\_\_\_\_ | Very Severe Pain

**OS**

No pain | \_\_\_\_\_ | Very Severe Pain

## PATIENT SATISFACTION

1. Overall, how satisfied have you been with the results of your cataract surgery in your ...?

**OD**

- Very dissatisfied  
 Dissatisfied  
 Neither satisfied nor dissatisfied  
 Satisfied  
 Very satisfied

**OS**

- Very dissatisfied  
 Dissatisfied  
 Neither satisfied nor dissatisfied  
 Satisfied  
 Very satisfied

2. Given your postoperative vision/outcome, if you had to do it all over again, would you select:

- LessDrops  
 3-Drops

3. Given your postoperative experience, if you had to do it all over again, would you select:

- LessDrops  
 3-Drops
